# Supplementary material for: Targeting the YXXΦ Motifs of the SARS Coronaviruses 1 and 2 ORF3a Peptides by In Silico Analysis to Predict Novel Virus—Host Interactions
Source: MDPI journal article supplement (doi:10.3390/biom12081052), 2022-07-29
Supplement: s1 [file s1]

**Table S1.** Presentation of the non-canonical YXXXΦ [M/L/I/V/F] motifs, the reverse [M/L/I/V/F] ΦXXY motifs and the di-leucine motifs within the SARS-CoV-ORF3a and SARS-CoV-2-ORF3a.

| SARS-CoV-ORF3a             |           | SARS-CoV-2-ORF3a |           |
|----------------------------|-----------|------------------|-----------|
| Non-canonical YXXXΦ motifs |           |                  |           |
| peptide                    | position  | peptide          | position  |
| YLYAI                      | 107 - 111 | YLYAV            | 107 - 111 |
| YDYCI                      | 154 - 158 | YDYCI            | 154 - 158 |
| YFTEV                      | 206 - 210 | -                | -         |
| -                          |           | YSTQL            | 215 - 219 |
| Reverse ΦXXY motifs        |           |                  |           |
| peptide                    | position  | peptide          | position  |
| LALY                       | 71-74     | -                | -         |
| VTIY                       | 88 - 91   | VTVY             | 88 - 91   |
| LYLY                       | 106 - 109 | LYLY             | 106 - 109 |
| IGGY                       | 186-189   | IGGY             | 186-189   |
| VKDY                       | 197 – 200 | -                | -         |
| VHGY                       | 203 - 206 | LHSY             | 203 - 206 |
| -                          | -         | FFIY             | 230 - 233 |
| Di-leucine motifs          |           |                  |           |
| peptide                    | position  | peptide          | position  |
| SKNPLL                     | 135-140   | SKNPLL           | 135-140   |

**Table S2.** Predicted transmembrane (TM) helices topology within the SARS-CoV-ORF3a and SARS-CoV-2-ORF3a.

| SARS-COV-ORF3a          |           | SARS-COV-2-ORF3a        |           |
|-------------------------|-----------|-------------------------|-----------|
| topology                | residues  | location                | residues  |
| outside                 | 1 - 42    | outside                 | 1 - 34    |
| 1 <sup>st</sup> TMhelix | 43 - 64   | 1 <sup>st</sup> TMhelix | 35 - 56   |
| inside                  | 65 - 75   | inside                  | 57 - 76   |
| 2 <sup>nd</sup> TMhelix | 76 - 99   | 2 <sup>nd</sup> TMhelix | 77 - 101  |
| outside                 | 100 - 104 | outside                 | 102 - 106 |
| 3 <sup>rd</sup> TMhelix | 105 - 125 | 3 <sup>rd</sup> TMhelix | 107 - 129 |
| inside                  | 126 - 274 | inside                  | 130 - 275 |

**Table S3.** Predicted  $\alpha$ -helices,  $\beta$ -sheets and coil segments within the SARS-CoV-ORF3a and SARS-CoV-2-ORF3a.

| SARS-CoV-ORF3a                  |           | SARS-CoV-2-ORF3a                |           |
|---------------------------------|-----------|---------------------------------|-----------|
| structure                       | position  | structure                       | position  |
| 1 <sup>st</sup> coil            | 1-3       | 1 <sup>st</sup> coil            | 1-3       |
| 1 <sup>st</sup> $\alpha$ -helix | 4-5       | -                               | -         |
| 1 <sup>st</sup> $\beta$ -sheet  | 6-10      | 1 <sup>st</sup> $\beta$ -sheet  | 4-15      |
| 2 <sup>nd</sup> coil            | 11-17     | 2 <sup>nd</sup> coil            | 16-28     |
| 2 <sup>nd</sup> $\beta$ -sheet  | 18-20     | -                               | -         |
| 3 <sup>d</sup> coil             | 21-28     | -                               | -         |
| 3 <sup>rd</sup> $\beta$ -sheet  | 29-35     | 2 <sup>nd</sup> $\beta$ -sheet  | 29-38     |
| 4 <sup>th</sup> $\beta$ -sheet  | 38        | -                               | -         |
| 4 <sup>th</sup> coil            | 39-43     | 3 <sup>rd</sup> coil            | 39-43     |
| 2 <sup>nd</sup> $\alpha$ -helix | 44-58     | 1 <sup>st</sup> $\alpha$ -helix | 44-57     |
| 5 <sup>th</sup> coil            | 59        | 4 <sup>th</sup> coil            | 58-61     |
| 3 <sup>rd</sup> $\alpha$ -helix | 60-61     | -                               | -         |
| 5 <sup>th</sup> $\beta$ -sheet  | 62-65     | 2 <sup>nd</sup> $\beta$ -sheet  | 62-65     |
| 5 <sup>th</sup> coil            | 66-67     | -                               | -         |
| 4 <sup>th</sup> $\alpha$ -helix | 68-75     | 2 <sup>nd</sup> $\alpha$ -helix | 66-74     |
| 6 <sup>th</sup> coil            | 76        | 5 <sup>th</sup> coil            | 75-76     |
| 5 <sup>th</sup> $\alpha$ -helix | 77-98     | 3 <sup>rd</sup> $\alpha$ -helix | 77-99     |
| 7 <sup>th</sup> coil            | 99-101    | 6 <sup>th</sup> coil            | 101-103   |
| 6 <sup>th</sup> $\alpha$ -helix | 102-130   | 4 <sup>th</sup> $\alpha$ -helix | 104-132   |
| 6 <sup>th</sup> $\beta$ -sheet  | 131-132   | -                               | -         |
| 8 <sup>th</sup> coil            | 133-139   | 6 <sup>th</sup> coil            | 133-139   |
| 7 <sup>th</sup> $\beta$ -sheet  | 140-142   | 3 <sup>rd</sup> $\beta$ -sheet  | 140-142   |
| 9 <sup>th</sup> coil            | 143-144   | 7 <sup>th</sup> coil            | 143-144   |
| 8 <sup>th</sup> $\beta$ -sheet  | 145-150   | 4 <sup>th</sup> $\beta$ -sheet  | 145-150   |
| 9 <sup>th</sup> $\beta$ -sheet  | 156-158   | 5 <sup>th</sup> $\beta$ -sheet  | 156-158   |
| 10 <sup>th</sup> coil           | 159-164   | 8 <sup>th</sup> coil            | 159-163   |
| 10 <sup>th</sup> $\beta$ -sheet | 165-170   | 6 <sup>th</sup> $\beta$ -sheet  | 164-170   |
| 11 <sup>th</sup> coil           | 171-199   | 9 <sup>th</sup> coil            | 171-190   |
| -                               | -         | 5 <sup>th</sup> $\alpha$ -helix | 191 - 194 |
| -                               | -         | 10 <sup>th</sup> coil           | 195-199   |
| 10 <sup>th</sup> $\beta$ -sheet | 200-205   | 7 <sup>th</sup> $\beta$ -sheet  | 200-204   |
| 12 <sup>th</sup> coil           | 206       | 11 <sup>th</sup> coil           | 205-211   |
| 11 <sup>th</sup> $\beta$ -sheet | 207-215   | 8 <sup>th</sup> $\beta$ -sheet  | 212-219   |
| 12 <sup>th</sup> coil           | 216       | -                               | -         |
| 11 <sup>th</sup> $\beta$ -sheet | 217-220   | -                               | -         |
| 13 <sup>th</sup> coil           | 221-228   | 12 <sup>th</sup> coil           | 220-225   |
| 12 <sup>th</sup> $\beta$ -sheet | 229 - 233 | 9 <sup>th</sup> $\beta$ -sheet  | 226 - 234 |
| 7 <sup>th</sup> $\alpha$ -helix | 234 - 236 | -                               | -         |
| 14 <sup>th</sup> coil           | 237-243   | 12 <sup>th</sup> coil           | 235-243   |
| 13 <sup>th</sup> $\beta$ -sheet | 244 - 248 | 10 <sup>th</sup> $\beta$ -sheet | 244 - 249 |
| 15 <sup>th</sup> coil           | 249-274   | 13 <sup>th</sup> coil           | 250-275   |

**Table S4.** Predicted phosphorylated Ser, Tyr and Thr residues (in red) located within the YXX $\Phi$  motifs, the YXX $\Phi$ -like tetrapeptides or adjacently to them, for SARS-CoV-ORF3a and SARS-CoV-2-ORF3a. The kinase catalysing each phosphorylation is indicated.

| SARS-CoV-ORF3a   |                  |           |                 |                    |
|------------------|------------------|-----------|-----------------|--------------------|
| position         | YXX $\Phi$ motif | sequence  | score           | kinase             |
| -                | -                | -         | -               | -                  |
| S92              | 1 <sup>st</sup>  | VTIYSHLLL | 0.512           | PKA                |
| Y160             | 3 <sup>rd</sup>  | YCIPYNSVT | 0.525           | unspecified        |
| S162             | 3 <sup>rd</sup>  | IPYNSVTD  | 0.971           | unspecified        |
| Y212             | 4 <sup>th</sup>  | TEVYQLES  | 0.532           | SRC                |
| T217             | -                | QLESTQITT | 0.518           | DNAPK              |
| SARS-CoV-2-ORF3a |                  |           |                 |                    |
| position         | YXX $\Phi$ motif | sequence  | score           | kinase             |
| S74              | upstream         | QLALSKGVH | 0.706/<br>0.535 | PKC/<br>cdc2       |
| S92              | 1 <sup>st</sup>  | VTVYSHLLL | 0.503           | cdc2               |
| Y160             | 3 <sup>rd</sup>  | YCIPYNSVT | 0.525           | unspecified        |
| T208             | -                | HSYFTSDYY | 0.774           | PKC                |
| S209             | -                | SYFTSDYYQ | 0.516/<br>0.502 | CKII/<br>PKA       |
| Y211             | 4 <sup>th</sup>  | FTSDYYQLY | 0.698/<br>0.518 | unspecified<br>NSR |
| Y212             | 4 <sup>th</sup>  | TEVYQLES  | 0.512           | SRC                |

**Table S5.** Predicted ubiquitinated Lys (in red) located within the YXX $\Phi$ -like tetrapeptides and proximal regions of SARS-CoV-ORF3a and SARS-CoV-2-ORF3a.

| SARS-CoV-ORF3a   |                   |                 |       |
|------------------|-------------------|-----------------|-------|
| position         | YXX $\Phi$ -motif | sequence        | score |
| K19              | -                 | SITAQPVKIDNASPA | 0.64  |
| K61              | -                 | AVFQSATKIIALNKR | 1.83  |
| K132             | -                 | MRCWLCWKCKSKNPL | 1.74  |
| K181             | -                 | GISTPKLKEDYQIGG | 0.52  |
| K235             | downstream-like   | ATFFIFNKLVDPPN  | 0.31  |
| SARS-CoV-2-ORF3a |                   |                 |       |
| position         | YXX $\Phi$ -motif | sequence        | score |
| K16              | -                 | TIGTVTLKQGEIKDA | 0.63  |
| K21              | -                 | TLKQGEIKDATPSDF | 1.13  |
| K61              | -                 | AVFQSASKIITLKKR | 2.46  |
| K66              | -                 | ASKIITLKKRWQLAL | 1.42  |
| K67              | -                 | SKIITLKKRWQLALS | 0.46  |
| K75              | upstream-like     | RWQLALSKGVHFVCN | 0.98  |
| K132             | -                 | MRLWLCWKCRSKNPL | 0.91  |

Threshold was set to 0.3

**Table S6.** *In silico* mutagenesis analysis for the adjacent residues (in red) to the Lys75 of the 1<sup>st</sup>YXXΦ-like tetrapeptide and ubiquitination prediction for these mutated sequences in SARS-CoV-2-ORF3a.

| SARS-CoV-2-ORF3a |             |       |
|------------------|-------------|-------|
|                  | amino acids | score |
| consensus        | SKGVHF      | 0.98  |
| mutated          | YKGVHF      | <0.3  |
| mutated          | SKGFHF      | 0.48  |
| mutated          | SKGVQF      | 0.74  |

Threshold was set to 0.3

**Table S7.** Predicted methylated Lys residues (in red) of SARS-CoV-ORF3a and SARS-CoV-2-ORF3a.

| SARS-CoV-ORF3a |            | SARS-CoV-2-ORF3a |            |
|----------------|------------|------------------|------------|
| position       | YXXΦ-motif | position         | YXXΦ-motif |
| -              | -          | K21              | -          |
| -              | -          | K66              | -          |
| K75            | upstream   | -                | -          |
| -              | -          | K136             | -          |
| -              | -          | K192             | -          |
| K235           | -          | K235             | downstream |
| K238           | -          | -                | -          |

**Table S8.** Predicted acetylated Lys residues (in red) of SARS-CoV-ORF3a and SARS-CoV-2-ORF3a.

| SARS-CoV-ORF3a   |               |                |       |
|------------------|---------------|----------------|-------|
| position         | YXXΦ motif    | sequence       | score |
| K61              | -             | VFQSATKIIALNK  | 1.32  |
| K132             | -             | RCWLCWKCKSKNP  | 1.67  |
| K134             | -             | WLCWKCKSKNPLL  | 0.64  |
| K198             | -             | DRHSGVKDYVVVH  | 0.27  |
| SARS-CoV-2-ORF3a |               |                |       |
| position         | YXXΦ motif    | sequence       | score |
| K16              | -             | IGTVTLKQGEIKD  | 0.92  |
| K21              | -             | LKQGEIKDATPSD  | 1.46  |
| K61              | -             | VFQSASKIITLKK  | 2.00  |
| K66              | -             | SKIITLKKRWQLA  | 0.64  |
| K75              | upstream-like | WQLALS KGVHFVC | 0.78  |
| K132             | -             | RLWLCWKCRSKNP  | 0.73  |

Threshold was set to 0.3

**Table S9.** Predicted nitrated Tyr residues of SARS-CoV-ORF3a and SARS CoV-2-ORF3a.

| SARS-CoV-ORF3a |                 |          | SARS-CoV-2-ORF3a |                 |          |
|----------------|-----------------|----------|------------------|-----------------|----------|
| position       | YXXΦ motif      | score    | position         | YXXΦ motif      | score    |
| Y91            | 1 <sup>st</sup> | ΔG=0.111 | -                | 1 <sup>st</sup> | -        |
| Y141           | -               | ΔG=0.492 | -                | -               | -        |
| Y145           | -               | ΔG=0.025 | Y145             | -               | ΔG=0.597 |
| -              | -               | -        | Y154             | -               | ΔG=2.703 |
| Y263           | -               | ΔG=0.273 | Y264             | -               | ΔG=0.606 |

ΔG: Free energy in kcal/mol.

**Table S10.** Predicted S-nitrosylated cysteines (in red) of SARS-CoV-ORF3a and SARS-CoV-2-ORF3a.

| SARS-CoV-ORF3a |     |          | SARS-CoV-2-ORF3a |       |                 |
|----------------|-----|----------|------------------|-------|-----------------|
| Position       | FRP | sequence | Position         | FRP   | sequence        |
| -              | -   | -        | C200             | 3.77% | WESGVKDCVVLHSYF |

FPR: false positive rate.

**Table S11.** Predicted S-glutathionylated Cys residues (in red) of SARS-CoV-ORF3a and SARS-CoV-2-ORF3a.

| SARS-CoV-ORF3a |     |          | SARS-CoV-2-ORF3a |       |                  |
|----------------|-----|----------|------------------|-------|------------------|
| Position       | FRP | sequence | Position         | FRP   | sequence         |
| -              | -   | -        | C130             | 4.67% | IIMRLWLCKWKCRSKN |
| -              | -   | -        | C200             | 0.61% | WESGVKDCVVLHSYF  |

FPR: false positive rate.

**Table S12.** Predicted sulfated Tyr residues (in red) of SARS-CoV-ORF3a and SARS-CoV-2-ORF3a.

| SARS-CoV-ORF3a   |                 |                 |       |
|------------------|-----------------|-----------------|-------|
| Y position       | YXXΦ motif      | sequence        | score |
| 154              | -               | VCWHTHNYDYCIPYN | 1.401 |
| 156              | -               | WHTHNYDYCIPYNSV | 1.366 |
| 184              | -               | TPCLKEDYQIGGYSE | 1.688 |
| 200              | extra           | RHSGVKDYVVVHGYF | 0.738 |
| 211              | 4 <sup>th</sup> | HGYFTEVYQLESTQ  | 0.594 |
| 212              | 4 <sup>th</sup> | GYFTEVYQLESTQI  | 0.485 |
| 263              | -               | NPAMDPIYDEPTTTT | 1.450 |
| SARS-CoV-2-ORF3a |                 |                 |       |
| Y position       | YXXΦ motif      | sequence        | score |
| 156              | -               | WHTNCYDYCIPYNSV | 1.406 |
| 184              | -               | SPISEHDYQIGGYTE | 2.025 |
| 211              | -               | HSYFTSDYQLYSTQ  | 1.767 |
| 212              | -               | SYFTSDYQLYSTQL  | 0.980 |
| 233              | 4 <sup>th</sup> | EHVTFFIYNKIVDEP | 1.248 |
| 264              | -               | NPVMEPIYDEPTTTT | 1.218 |

Threshold was set at 1.139
